- and labetalol to attenuate hyperdynamic states after electroconvulsive therapy. *Anesth Analg* 1995; 80:557–61
20. Howie MB, Black HA, Zvara D, McSweeney TD, Martin DJ, Coffinan JA: Esmolol reduces autonomic hypersensitivity and length of seizures induced by electroconvulsive therapy. *Anesth Analg* 1990; 71:384–8
  21. Zhang Y, White PF, Thornton L, Perdue L, Downing M: The use of nicardipine for electroconvulsive therapy: A dose-ranging study. *Anesth Analg* 2005; 100:378–81
  22. Zvara DA, Brooker RF, McCall WV, Foreman AS, Hewitt C, Murphy BA, Royster RL: The effect of esmolol on ST-segment depression and arrhythmias after electroconvulsive therapy. *Convuls Ther* 1997; 13:165–74
  23. Aydogan MS, Yücel A, Begec Z, Colak YZ, Durmus M: The hemodynamic effects of dexmedetomidine and esmolol in electroconvulsive therapy: A retrospective comparison. *J ECT* 2013; 29:308–11

## ANESTHESIOLOGY REFLECTIONS FROM THE WOOD LIBRARY-MUSEUM

### Missouri's New York Dental Rooms: Advertising Laughing Gas in English and German

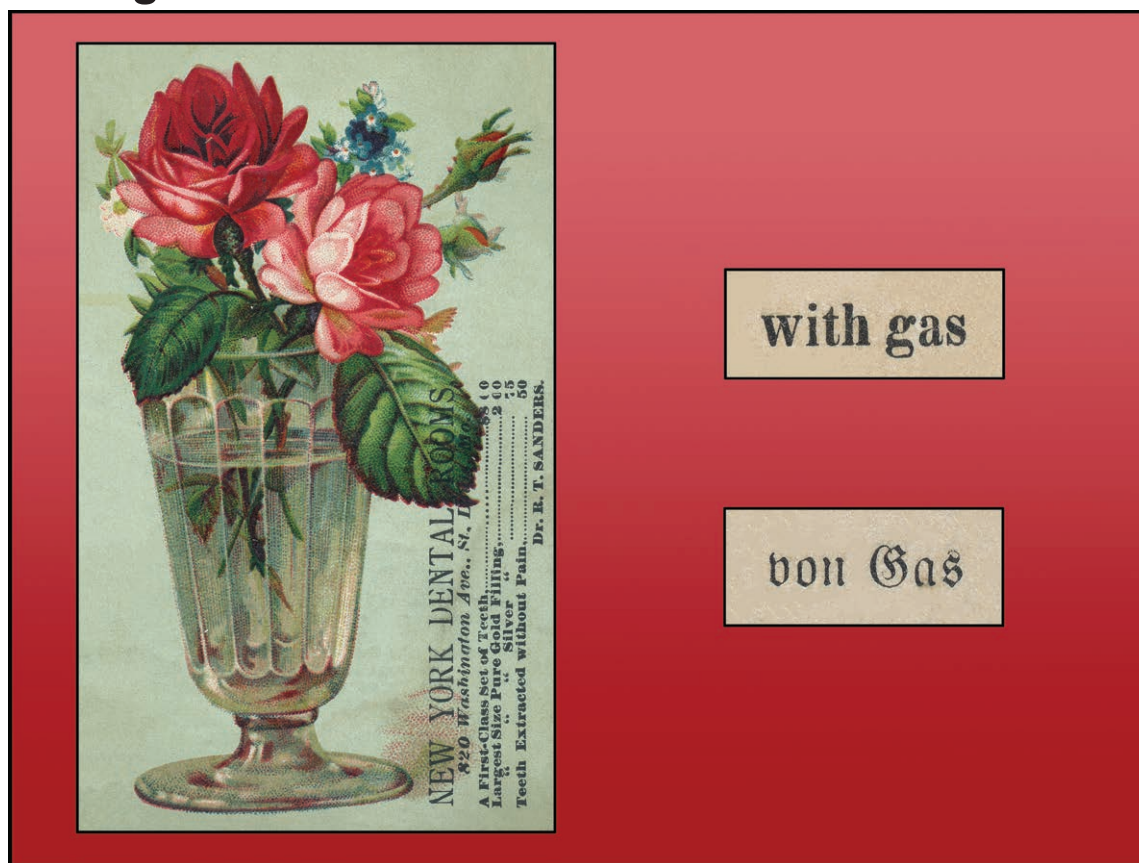

Although born in Philadelphia, Dr. Robert T. Sanders (1830 to 1898) spent most of his dental career in Missouri. In 1871 he began practicing dentistry in St. Louis under his trademark of “New York Dental Rooms.” As imprinted up the right side of this trade card’s obverse (*left*), his office was on Washington Street. He practiced at that location from 1875 to 1888, which helps in dating this trade card. Fluent in English and German, Dr. Sanders promised, for 50 cents, painless dental extractions either “with gas” or “von gas” (both *right*). This made him particularly popular with the waves of German immigrants working in the city’s papermaking and tobacco processing factories, flour mills, and breweries. (Copyright © the American Society of Anesthesiologists’ Wood Library-Museum of Anesthesiology.)

*George S. Bause, M.D., M.P.H., Honorary Curator and Laureate of the History of Anesthesia, Wood Library-Museum of Anesthesiology, Schaumburg, Illinois, and Clinical Associate Professor, Case Western Reserve University, Cleveland, Ohio. UJYC@aol.com.*
